# Supplementary material for: Ion recognition properties of 2,2′-bibenzimidazole regulated by ammonium-modified pillar[5]arenes
Source: Royal Society of Chemistry journal article supplement (doi:10.1039/d3an00095h), 2023-01-01
Supplement: d3an00095h1.pdf [file d3an00095h1.pdf]

*Supplemental Information*

**Ions recognition properties of 2'2-bibenzimidazole regulated by  
ammonium modified pillar[5]arene**

Hong Yao,\* Yin-Ping Hu, Hao-Ran Yang, Bao-Hong Yang, Jin-Wang Wang, You-Ming Zhang, Tai-Bao Wei, and Qi Lin\*

*Key Laboratory of Eco-Functional Polymer Materials of the Ministry of Education, Key  
Laboratory of Polymer Materials of Gansu Province, College of Chemistry and Chemical  
Engineering, Northwest Normal University, Lanzhou, Gansu, 730070. P. R. China*

---

\* E-mail: yhxbz@126.com, linqi2004@126.com

---

## Table of Contents

|                                                                                                                                                                                                                                                                                       |    |
|---------------------------------------------------------------------------------------------------------------------------------------------------------------------------------------------------------------------------------------------------------------------------------------|----|
| <b>Scheme S1.</b> Synthesis route of <b>HAP5</b> .....                                                                                                                                                                                                                                | 3  |
| <b>Fig. S1</b> <sup>1</sup> H NMR (400 MHz, 298K) spectra of <b>HAP5</b> in DMSO- <i>d</i> <sub>6</sub> .....                                                                                                                                                                         | 4  |
| <b>Fig. S2</b> <sup>13</sup> C NMR (150 MHz, 298K) spectra of <b>HAP5</b> in D <sub>2</sub> O.....                                                                                                                                                                                    | 4  |
| <b>Fig. S3</b> ESI-MS spectra of <b>HAP5</b> .....                                                                                                                                                                                                                                    | 4  |
| <b>Scheme S2.</b> Synthesis route of <b>G</b> .....                                                                                                                                                                                                                                   | 5  |
| <b>Fig. S4</b> <sup>1</sup> H NMR (400 MHz, 298K) spectra of <b>G</b> in DMSO- <i>d</i> <sub>6</sub> .....                                                                                                                                                                            | 5  |
| <b>Fig. S5</b> <sup>13</sup> C NMR (150 MHz, 298K) spectra of <b>G</b> in DMSO- <i>d</i> <sub>6</sub> .....                                                                                                                                                                           | 6  |
| <b>Fig. S6</b> ESI-MS spectra of <b>G</b> .....                                                                                                                                                                                                                                       | 6  |
| <b>Fig. S7.</b> Fluorescent spectra of <b>G</b> in DMSO/H <sub>2</sub> O in the presence of cations.....                                                                                                                                                                              | 7  |
| <b>Fig. S8</b> Fluorescence spectrum of <b>G</b> in the presence of different equivalents of Cu <sup>2+</sup> , Hg <sup>2+</sup> , Fe <sup>3+</sup> , Ag <sup>+</sup> in DMSO/H <sub>2</sub> O binary solution.....                                                                   | 7  |
| <b>Fig. S9</b> Fluorescent spectrum linear range for Cu <sup>2+</sup> , Hg <sup>2+</sup> , Fe <sup>3+</sup> , and Ag <sup>+</sup> with <b>G</b> and <i>K</i> <sub>a</sub> .....                                                                                                       | 8  |
| <b>Fig. S10</b> A plot of fluorescent intensity of <b>G</b> depending on the concentration of Cu <sup>2+</sup> , Hg <sup>2+</sup> , Fe <sup>3+</sup> and Ag <sup>+</sup> in the range from different equivalents.....                                                                 | 9  |
| <b>Table S1</b> Calculation formula and related date of the detection limits of <b>G</b> for Cu <sup>2+</sup> , Hg <sup>2+</sup> , Fe <sup>3+</sup> and Ag <sup>+</sup> .....                                                                                                         | 9  |
| <b>Table S2</b> Association constants of the <b>G</b> treated by Cu <sup>2+</sup> , Hg <sup>2+</sup> , Fe <sup>3+</sup> and Ag <sup>+</sup> .....                                                                                                                                     | 10 |
| <b>Fig. S11.</b> Fluorescence titration of <b>G</b> in DMSO/water aqueous solution system upon addition of increasing with <b>HAP5</b> .....                                                                                                                                          | 10 |
| <b>Fig. S12</b> <sup>1</sup> H NMR spectra of <b>HAP5</b> (DMSO- <i>d</i> <sub>6</sub> ) and in the presence of varying amounts of <b>G</b> ..                                                                                                                                        | 10 |
| <b>Fig. S13</b> Fluorescence spectrum of <b>HG</b> in the presence of different equivalents of Cu <sup>2+</sup> , Hg <sup>2+</sup> , Fe <sup>3+</sup> , Ag <sup>+</sup> in DMSO/H <sub>2</sub> O binary solution.....                                                                 | 11 |
| <b>Fig. S14</b> Fluorescent spectrum linear range for Cu <sup>2+</sup> , Hg <sup>2+</sup> , Fe <sup>3+</sup> , and Ag <sup>+</sup> with <b>HG</b> and <i>K</i> <sub>a</sub> between Cu <sup>2+</sup> , Hg <sup>2+</sup> , Fe <sup>3+</sup> , and Ag <sup>+</sup> with <b>HG</b> ..... | 12 |
| <b>Fig. S15</b> A plot of fluorescent intensity of <b>HG</b> depending on the concentration of Cu <sup>2+</sup> , Hg <sup>2+</sup> , Fe <sup>3+</sup> and Ag <sup>+</sup> in the range from different equivalents.....                                                                | 13 |
| <b>Table S3</b> Calculation formula and related date of the detection limits of <b>HG</b> for Cu <sup>2+</sup> , Hg <sup>2+</sup> , Fe <sup>3+</sup> and Ag <sup>+</sup> .....                                                                                                        | 13 |
| <b>Table S4</b> Association constants of the <b>HG</b> treated by Cu <sup>2+</sup> , Hg <sup>2+</sup> , Fe <sup>3+</sup> and Ag <sup>+</sup> .....                                                                                                                                    | 14 |
| <b>Fig. S16</b> Fluorescence spectrum of <b>HG-Ag<sup>+</sup></b> in the presence of different equivalents of I <sup>-</sup> in DMSO/H <sub>2</sub> O binary solution and Fluorescent spectrum linear range for I <sup>-</sup> .....                                                  | 14 |
| <b>Fig. S17</b> Fluorescence spectrum of <b>HG-Cu<sup>2+</sup></b> in the presence of different equivalents of HSO <sub>4</sub> <sup>-</sup> ..                                                                                                                                       | 14 |
| <b>Tab. S5</b> Association constants of the <b>HG-M</b> (M= Hg <sup>2+</sup> , Ag <sup>+</sup> and Cu <sup>2+</sup> ) treated by I <sup>-</sup> and HSO <sub>4</sub> <sup>-</sup> .....                                                                                               | 15 |
| <b>Fig. S18</b> Frontier molecular orbital amplitude plots and electronic properties of <b>HAP5</b> and <b>G</b> .....                                                                                                                                                                | 15 |

**Fig. S19** The electrostatic potential surface of **HAP5** and **G**.

15

**Tab. S6** Comparative result of I<sup>-</sup> chemosensors

15

**Tab. S7** Comparative result of HSO<sub>4</sub><sup>-</sup> chemosensors

16

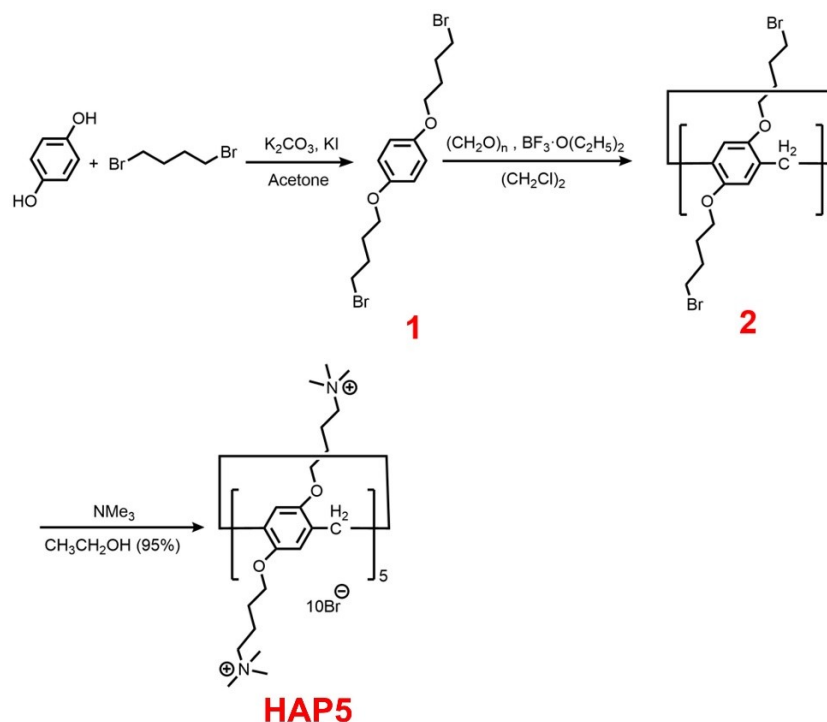

**Scheme S1.** Synthesis route of **HAP5**

### Synthesis of compound **HAP5**

We synthesized compound **1** and **2** according to the literature.<sup>1,2</sup> The compound **2** (1.96 g, 1.0 mmol) and trimethylamine (33% in ethanol, 7.20 mL, 30.0 mmol) were added to ethanol (50 mL). The solution was refluxed over night at 80°C. Then the solvent was removed by evaporation, deionized water (20 mL) was added. After filtration, a clear solution was obtained and then the water was removed by evaporation to obtain **HAP5** as a white solid (2.56 g, yield 95%). m.p. 217-219°C. <sup>1</sup>H NMR (400 MHz, DMSO-*d*<sub>6</sub>),  $\delta$ /ppm:  $\delta$  6.83 (s, 10H), 4.07 (s, 10H), 3.83 (d,  $J = 8.3$  Hz, 10H), 3.70 (s, 10H), 3.59 (s, 20H), 3.17 (s, 90H), 1.90 (d,  $J = 46.4$  Hz, 40H). <sup>13</sup>C NMR (150 MHz, DMSO-*d*<sub>6</sub>),  $\delta$ /ppm: 150.12, 129.22, 116.81, 68.46, 65.87, 52.87, 25.78 and 19.46. EMI-MS  $m/z$ : calcd for  $C_{105}H_{190}N_{10}O_{10}Br_9KNa$  [**HAP5** - Br + K + 3Na]<sup>5+</sup>:513.9329, found:513.5933.

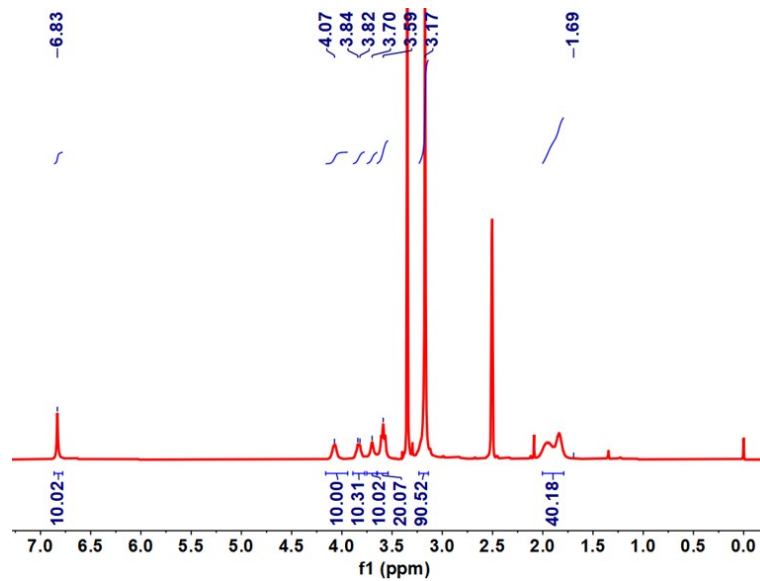

Fig. S1  $^1\text{H}$  NMR (400 MHz, 298K) spectra of HAP5 in  $\text{DMSO-}d_6$ .

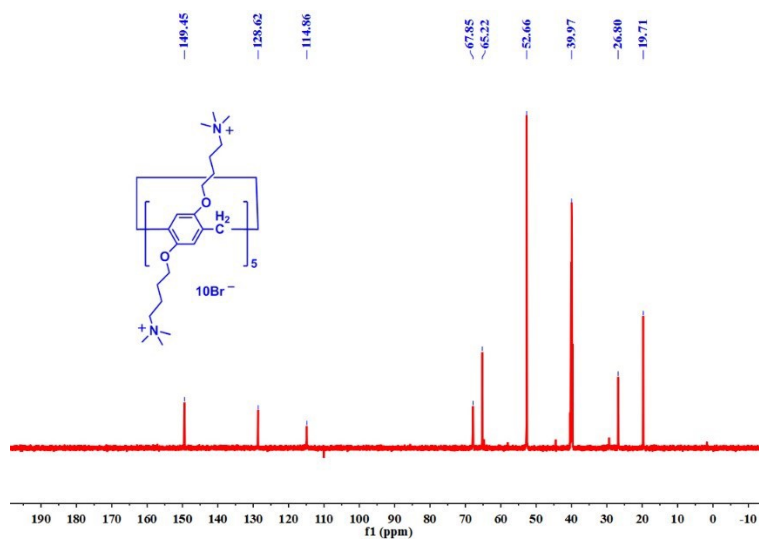

Fig. S2  $^{13}\text{C}$  NMR (150 MHz, 298K) spectra of HAP5 in  $\text{D}_2\text{O}$ .

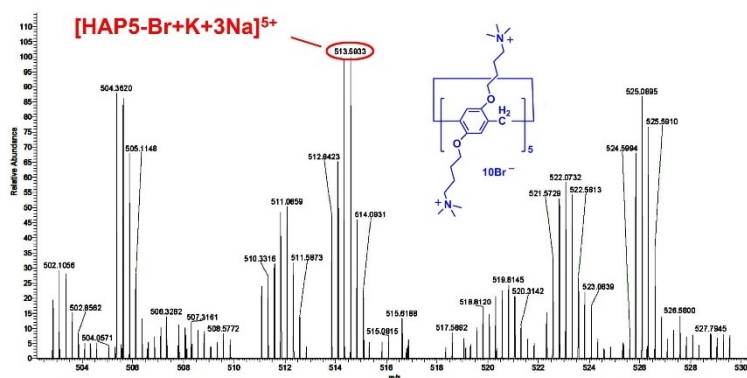

Fig. S3 ESI-MS spectra of HAP5

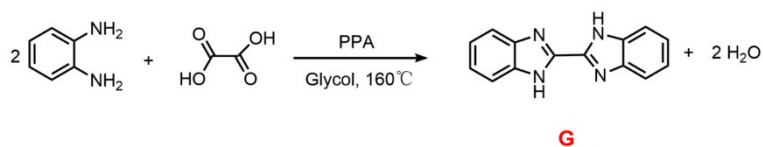

**Scheme S2.** Synthesis route of **G**

### Synthesis of compound **G**

We synthesized compound **G** according to the literature.<sup>3</sup> The amidation reaction was carried out at low temperature by grinding method, and then the ring-closure reaction was completed during reflux. The 1,2-diaminobenzene (7.2 g, 67 mmol), polyphosphoric acid (12 mL) and oxalic acid (4.2 g, 33 mmol) were added to ethylene glycol (50 mL). The solution was refluxed 1.5 h at 160°C. Then cool to room temperature, deionized water (300 mL) was added. After filtration, the product was recrystallized to obtain **G** as a yellow needle-like solid (12.9 g, yield 83.0%). <sup>1</sup>H NMR (400 MHz, DMSO-*d*<sub>6</sub>) δ 6.90 (s, 10H), 4.04 (s, 29H), 3.07 (s, 128H), 1.69 (s, 41H). <sup>13</sup>C NMR (150 MHz, DMSO-*d*<sub>6</sub>), δ/ppm: 21.48, 144.19, 172.51. EMI-MS *m/z*: calcd for C<sub>14</sub>H<sub>10</sub>N<sub>4</sub> [G-H]<sup>+</sup>: 234.0905, found: 233.0829.

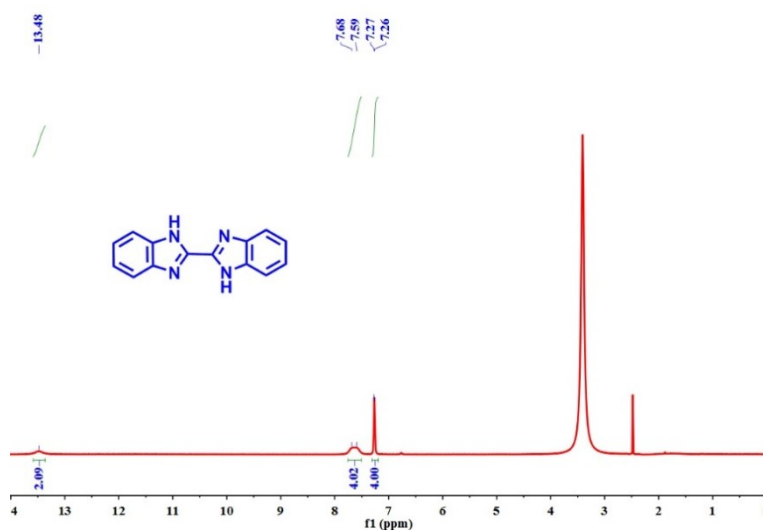

**Fig. S4** <sup>1</sup>H NMR (400 MHz, 298K) spectra of **G** in DMSO-*d*<sub>6</sub>.

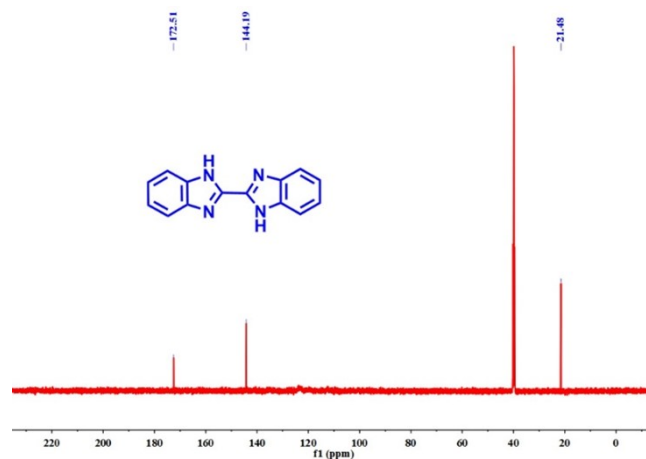

Fig. S5  $^{13}\text{C}$  NMR (150 MHz, 298K) spectra of **G** in  $\text{DMSO-}d_6$ .

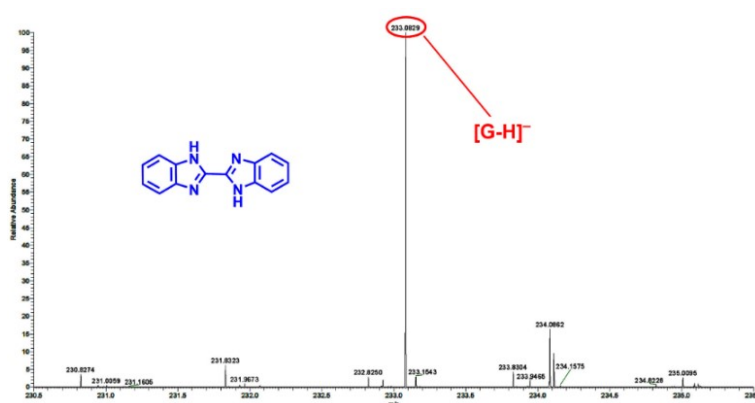

Fig. S6 ESI-MS spectra of **G**

### General conditions for fluorescence experiments:

All the fluorescence spectroscopy was carried out in in  $\text{DMSO}/\text{H}_2\text{O}$  (1:1, v/v) solution on a Shimadzu RF-5301 spectrometer. All of the solutions prepared fresh and used it at room temperature.

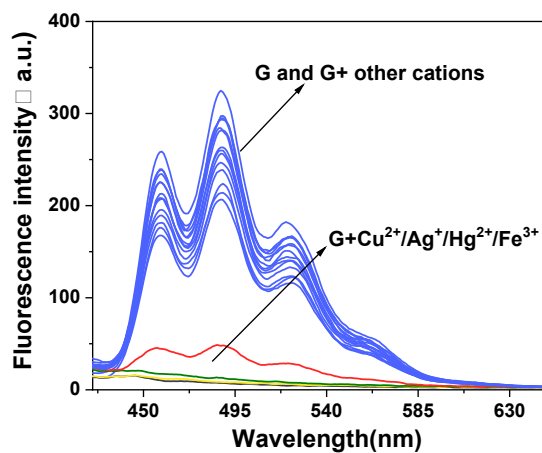

Fig. S7. Fluorescent spectra of **G** ( $2.0 \times 10^{-5}$  M) in  $\text{DMSO}/\text{H}_2\text{O}$  (1:1, v/v) in the presence of cations (10 equiv.).

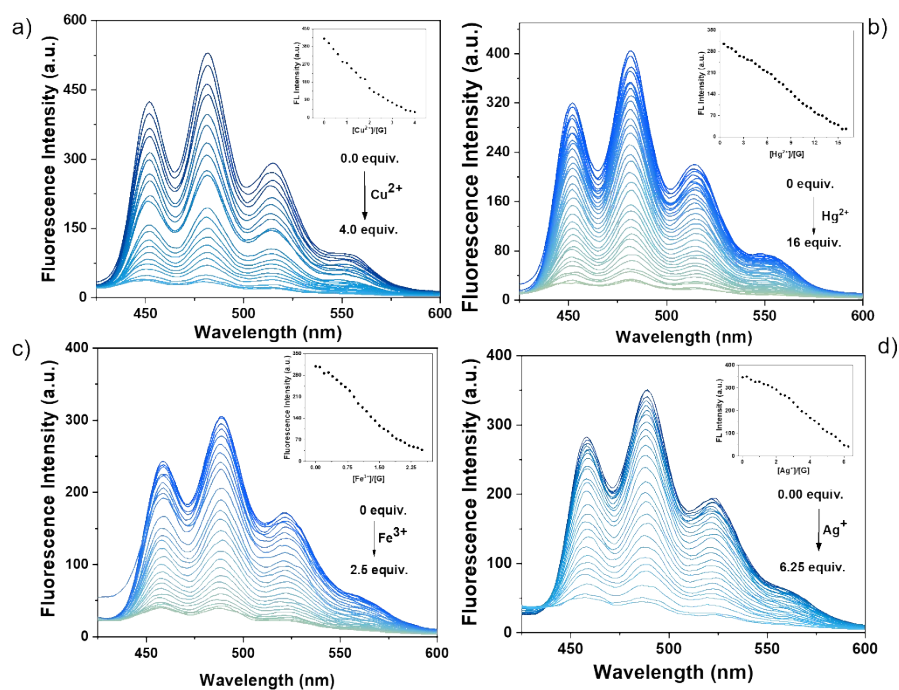

**Fig. S8** (a) Fluorescence spectrum of **G** ( $2 \times 10^{-5}$  M) in the presence of different equivalents of  $\text{Cu}^{2+}$  in DMSO/ $\text{H}_2\text{O}$  (v/v=1:1) binary solution. (b) Fluorescence spectrum of **G** ( $2 \times 10^{-5}$  M) in the presence of different equivalents of  $\text{Hg}^{2+}$  in DMSO/ $\text{H}_2\text{O}$  (v/v=1:1) binary solution. (c) Fluorescence spectrum of **G** ( $2 \times 10^{-5}$  M) in the presence of different equivalents of  $\text{Fe}^{3+}$  in DMSO/ $\text{H}_2\text{O}$  (v/v=1:1) binary solution. (d) Fluorescence spectrum of **G** ( $2 \times 10^{-5}$  M) in the presence of different equivalents of  $\text{Ag}^+$  in DMSO/ $\text{H}_2\text{O}$  (v/v=1:1) binary solution.

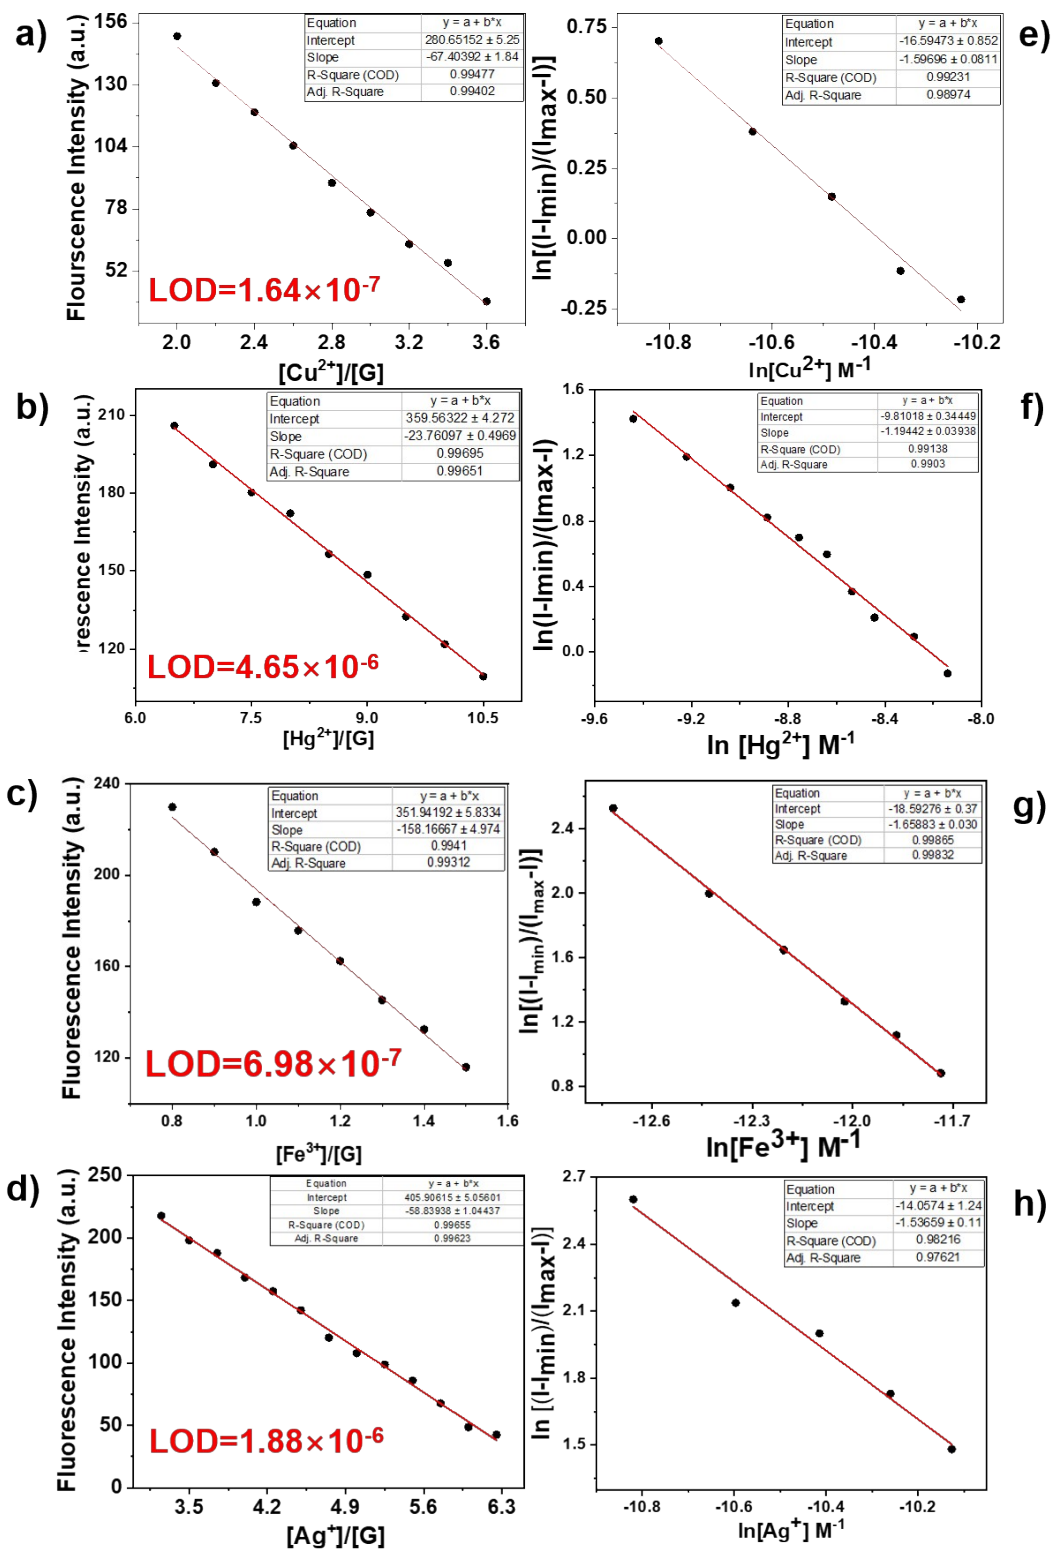

**Fig. S9** (a-d) Fluorescent spectrum linear range for  $Cu^{2+}$ ,  $Hg^{2+}$ ,  $Fe^{3+}$ , and  $Ag^+$  by addition of various concentrations of  $Cu^{2+}$ ,  $Hg^{2+}$ ,  $Fe^{3+}$ , and  $Ag^+$  into G. (d-f) The photograph of the linear range based on Bensi-Hildebrand equation to calculated  $K_a$  between  $Cu^{2+}$ ,  $Hg^{2+}$ ,  $Fe^{3+}$ , and  $Ag^+$  with G.



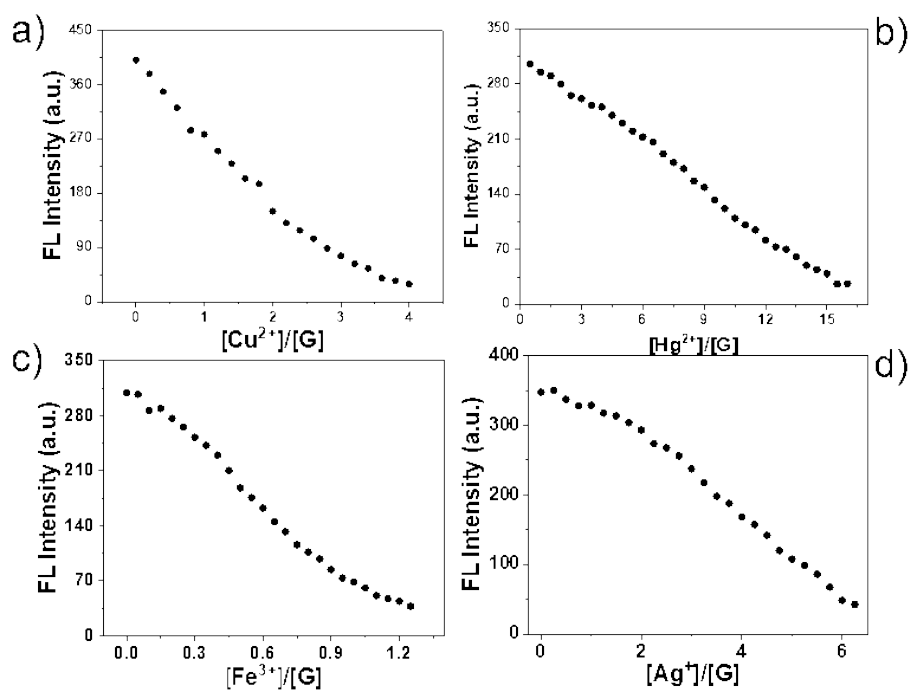

**Fig. S10** A plot of fluorescent intensity depending on the concentration of  $\text{Cu}^{2+}$ ,  $\text{Hg}^{2+}$ ,  $\text{Fe}^{3+}$  and  $\text{Ag}^+$  in the range from different equivalents: (a) **G-Cu<sup>2+</sup>**, (b) **G-Hg<sup>2+</sup>**, (c) **G-Fe<sup>3+</sup>** and (d) **G-Ag<sup>+</sup>**.

**Tab. S1** Calculation formula and related date of the detection limits of **G** for  $\text{Cu}^{2+}$ ,  $\text{Hg}^{2+}$ ,  $\text{Fe}^{3+}$  and  $\text{Ag}^+$ .

| Cation           | A(Slope) | B(Intercept) | R <sup>2</sup> | $\delta$ | S                  | LOD                   |
|------------------|----------|--------------|----------------|----------|--------------------|-----------------------|
| $\text{Cu}^{2+}$ | 67.4039  | 280.6515     | 0.994          | 3.683    | $6.74 \times 10^6$ | $1.64 \times 10^{-6}$ |
| $\text{Hg}^{2+}$ | 23.7610  | 359.5632     | 0.996          | 3.683    | $2.38 \times 10^7$ | $4.65 \times 10^{-6}$ |
| $\text{Fe}^{3+}$ | 158.1667 | 351.9419     | 0.994          | 3.683    | $1.58 \times 10^8$ | $6.98 \times 10^{-7}$ |
| $\text{Ag}^+$    | 58.8394  | 405.9061     | 0.996          | 3.683    | $5.88 \times 10^7$ | $1.88 \times 10^{-6}$ |

*Liner Equation*  $y = Ax + B$

Calculation formula  $\delta = \frac{\sqrt{\sum(F - F)^2}}{\sqrt{(N - 1)}}$       N=20      K=3      S=A×10<sup>6</sup>

**LOD=K× $\delta$ /S**

**Tab. S2** Association constants of the **G** treated by  $\text{Cu}^{2+}$ ,  $\text{Hg}^{2+}$ ,  $\text{Fe}^{3+}$  and  $\text{Ag}^+$ , calculation formula and related data.

| Compand | Metal ions       | A(Slope) | B(Intercept) | R <sup>2</sup> | Ka/M <sup>-1</sup> |
|---------|------------------|----------|--------------|----------------|--------------------|
| G       | $\text{Cu}^{2+}$ | 1.59     | 16.59        | 0.989          | $1.60 \times 10^7$ |
| G       | $\text{Hg}^{2+}$ | 1.19     | 9.81         | 0.990          | $1.82 \times 10^4$ |
| G       | $\text{Fe}^{3+}$ | 1.66     | 18.59        | 0.998          | $1.18 \times 10^8$ |
| G       | $\text{Ag}^+$    | 1.54     | 14.06        | 0.976          | $1.28 \times 10^6$ |

Calculation formula

$$\text{Liner Equation } y = Ax + B \quad \ln \frac{I - I_{\min}}{I_{\max} - I} = -\ln Ka - n \ln [M^{2+}]$$
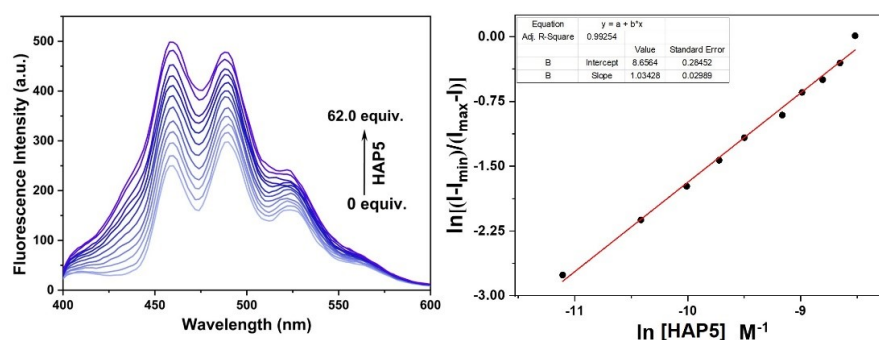

**Fig. S11.** Fluorescence titration of **G** ( $2.0 \times 10^{-5}$  M) in DMSO/water aqueous solution system (1:1, v/v) upon addition of increasing with **HAP5**.

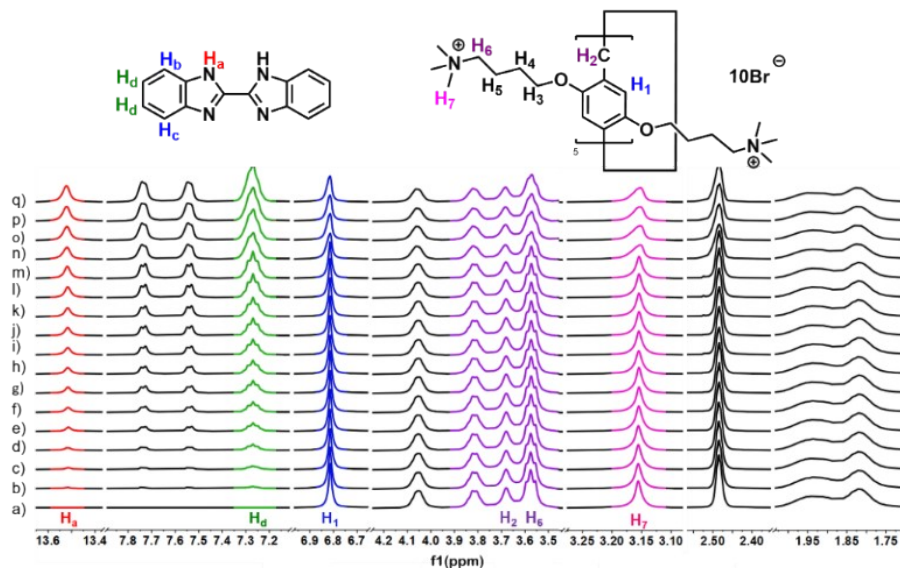

**Fig. S12** <sup>1</sup>H NMR spectra of **HAP5** ( $\text{DMSO}-d_6$ ) and in the presence of varying amounts of **G** from 0 equiv. to 2 equiv.

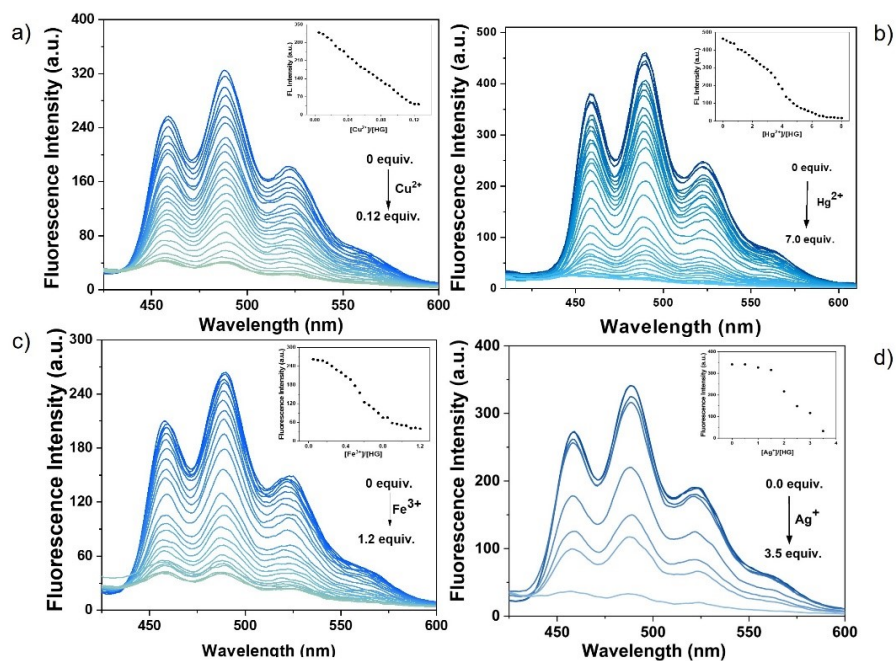

**Fig. S13** (a) Fluorescence spectrum of **HG** ( $2 \times 10^{-5}$  M) in the presence of different equivalents of  $\text{Cu}^{2+}$  in DMSO/ $\text{H}_2\text{O}$  (v/v=1:1) binary solution. (b) Fluorescence spectrum of **HG** ( $2 \times 10^{-5}$  M) in the presence of different equivalents of  $\text{Hg}^{2+}$  in DMSO/ $\text{H}_2\text{O}$  (v/v=1:1) binary solution. (c) Fluorescence spectrum of **HG** ( $2 \times 10^{-5}$  M) in the presence of different equivalents of  $\text{Fe}^{3+}$  in DMSO/ $\text{H}_2\text{O}$  (v/v=1:1) binary solution. (d) Fluorescence spectrum of **HG** ( $2 \times 10^{-5}$  M) in the presence of different equivalents of  $\text{Ag}^{+}$  in DMSO/ $\text{H}_2\text{O}$  (v/v=1:1) binary solution.

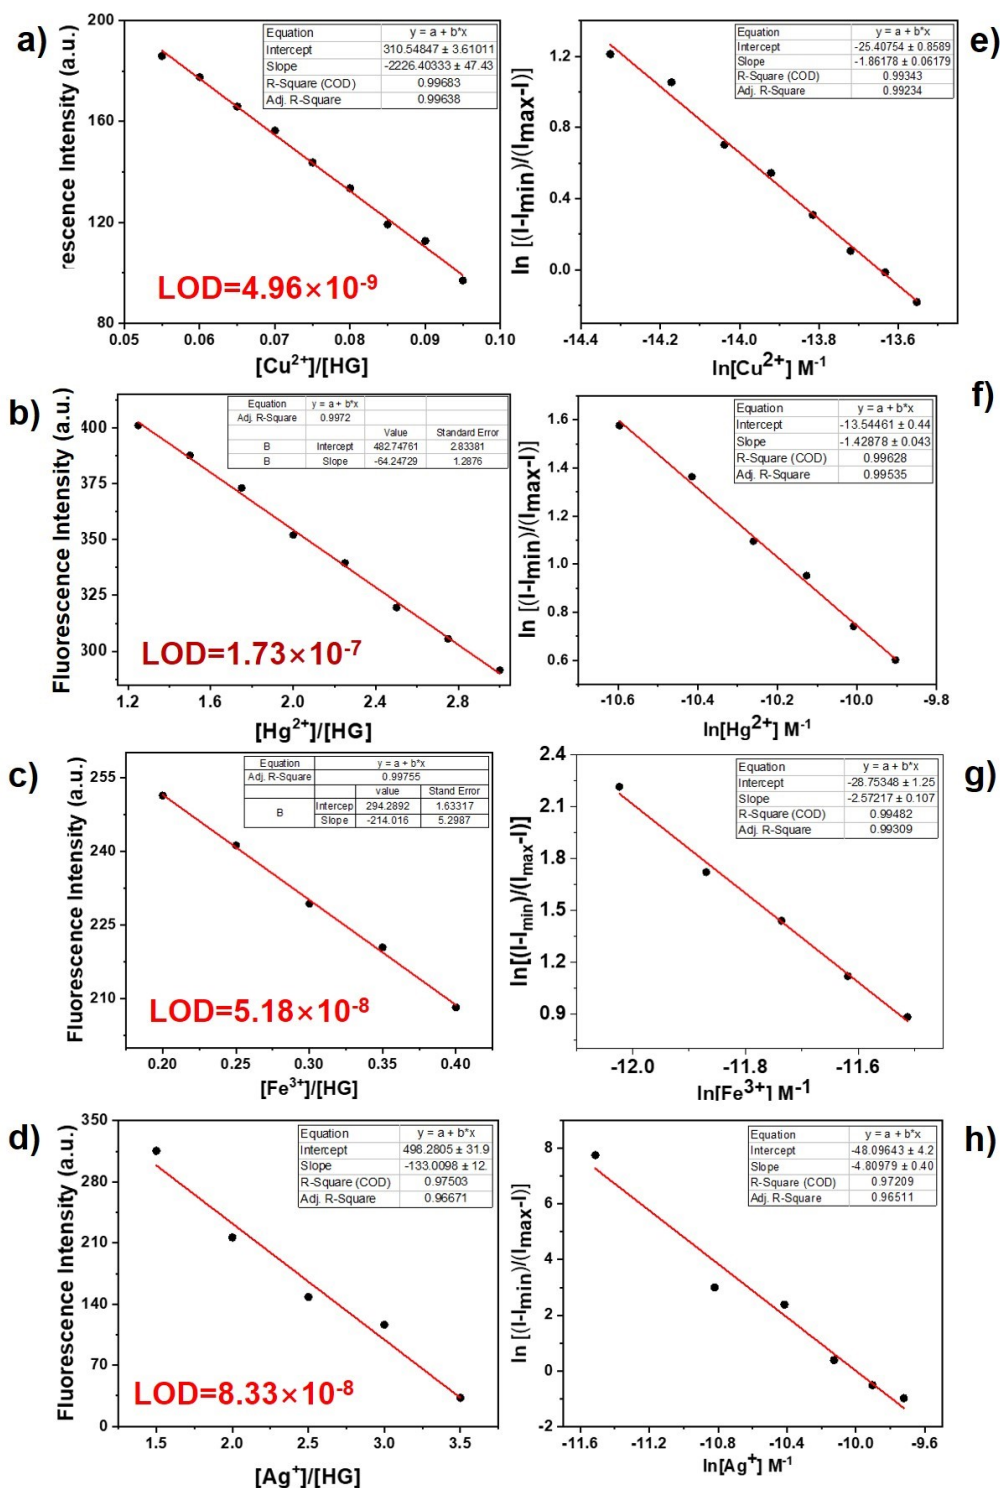

**Fig. S14 (a-d)** Fluorescent spectrum linear range for  $\text{Cu}^{2+}$ ,  $\text{Hg}^{2+}$ ,  $\text{Fe}^{3+}$ , and  $\text{Ag}^{+}$  by addition of various concentrations of  $\text{Cu}^{2+}$ ,  $\text{Hg}^{2+}$ ,  $\text{Fe}^{3+}$ , and  $\text{Ag}^{+}$  into HG. **(d-f)** The photograph of the linear range based on Bensi-Hildebrand equation to calculated  $K_a$  between  $\text{Cu}^{2+}$ ,  $\text{Hg}^{2+}$ ,  $\text{Fe}^{3+}$ , and  $\text{Ag}^{+}$  with HG.

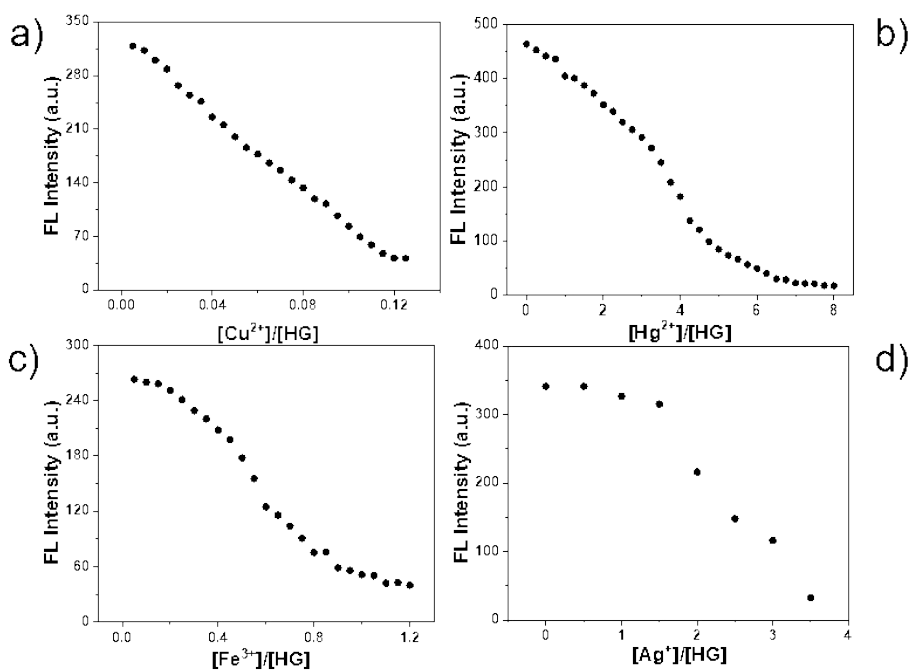

**Fig. S15** A plot of fluorescent intensity depending on the concentration of  $\text{Cu}^{2+}$ ,  $\text{Hg}^{2+}$ ,  $\text{Fe}^{3+}$  and  $\text{Ag}^+$  in the range from different equivalents: (a) **HG-Cu<sup>2+</sup>**, (b) **HG-Hg<sup>2+</sup>**, (c) **HG-Fe<sup>3+</sup>** and (d) **HG-Ag<sup>+</sup>**.

**Tab. S3** Calculation formula and related date of the detection limits of **HG** for  $\text{Cu}^{2+}$ ,  $\text{Hg}^{2+}$ ,  $\text{Fe}^{3+}$  and  $\text{Ag}^+$ .

| Cation           | A(Slope) | B(Intercept) | R <sup>2</sup> | $\delta$ | S                  | LOD                   |
|------------------|----------|--------------|----------------|----------|--------------------|-----------------------|
| $\text{Cu}^{2+}$ | 2226.40  | 310.55       | 0.997          | 3.694    | $2.23 \times 10^9$ | $4.96 \times 10^{-9}$ |
| $\text{Hg}^{2+}$ | 64.24    | 482.75       | 0.997          | 3.694    | $6.42 \times 10^7$ | $1.73 \times 10^{-7}$ |
| $\text{Fe}^{3+}$ | 214.01   | 294.29       | 0.998          | 3.694    | $2.14 \times 10^8$ | $5.18 \times 10^{-8}$ |
| $\text{Ag}^+$    | 133.01   | 133.01       | 0.966          | 3.694    | $1.33 \times 10^8$ | $8.33 \times 10^{-8}$ |

*Liner Equation*  $y = Ax + B$

Calculation formula  $\delta = \sqrt{\frac{\sum(F - \bar{F})^2}{(N - 1)}}$       N=20      K=3      S=A $\times 10^6$

**LOD=K $\times \delta$ /S**

**Tab. S4** Association constants of the **HG** treated by  $\text{Cu}^{2+}$ ,  $\text{Hg}^{2+}$ ,  $\text{Fe}^{3+}$  and  $\text{Ag}^+$ , calculation

| Compand | Metal ions       | A(Slope) | B(Intercept) | R <sup>2</sup> | Ka/M <sup>-1</sup>    |
|---------|------------------|----------|--------------|----------------|-----------------------|
| HG      | $\text{Cu}^{2+}$ | 1.86     | 25.41        | 0.992          | $1.08 \times 10^{11}$ |
| HG      | $\text{Hg}^{2+}$ | 1.43     | 13.54        | 0.995          | $7.59 \times 10^5$    |
| HG      | $\text{Fe}^{3+}$ | 2.57     | 28.75        | 0.993          | $3.06 \times 10^{12}$ |
| HG      | $\text{Ag}^+$    | 4.81     | 48.09        | 0.965          | $7.68 \times 10^{20}$ |

Calculation formula

$$\text{Liner Equation } y = Ax + B \quad \ln \frac{I - I_{\min}}{I_{\max} - I} = -\ln Ka - n \ln [M^{2+}]$$

formula and related data.

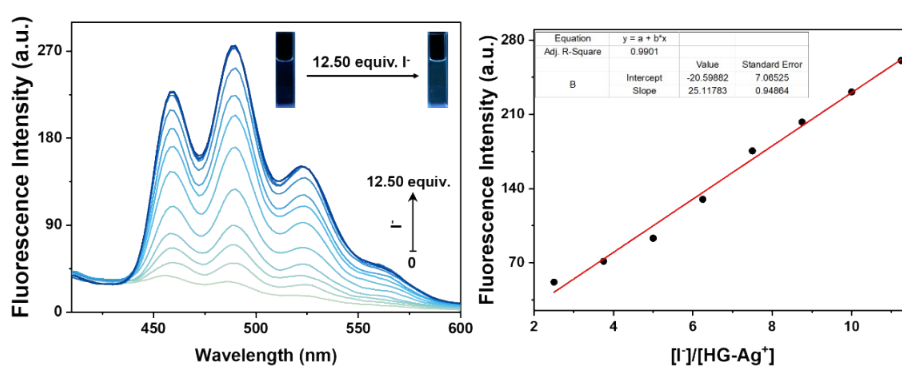

**Fig. S16 (left)** Fluorescence spectrum of **HG-Ag<sup>+</sup>** ( $2 \times 10^{-5}$  M, 3.5 equiv.  $\text{Ag}^+$ ) in the presence of different equivalents of  $\text{I}^-$  in DMSO/ $\text{H}_2\text{O}$  ( $v/v=1:1$ ) binary solution; **(right)** Fluorescent spectrum linear range for  $\text{I}^-$  by addition of various concentrations of  $\text{I}^-$ , into **HG-Ag<sup>+</sup>**.

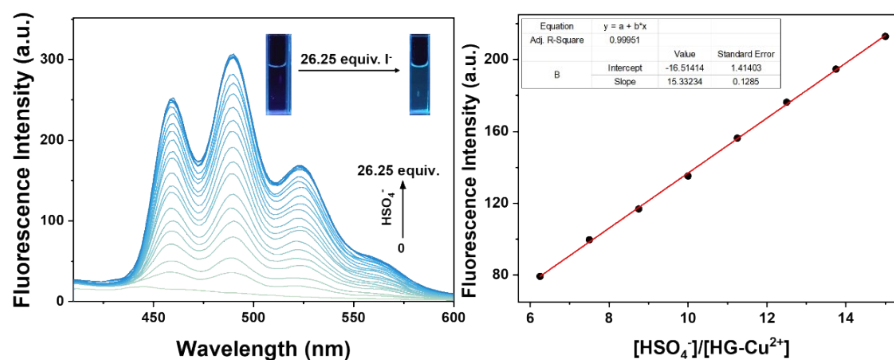

**Fig. S17 (left)** Fluorescence spectrum of **HG-Cu<sup>2+</sup>** ( $2 \times 10^{-5}$  M, 6.5 equiv.  $\text{Hg}^{2+}$ ) in the presence of different equivalents of  $\text{I}^-$  in DMSO/ $\text{H}_2\text{O}$  ( $v/v=1:1$ ) binary solution; **(right)** Fluorescent spectrum linear range for  $\text{I}^-$  by addition of various concentrations of  $\text{I}^-$  into **HG-Cu<sup>2+</sup>**.

**Tab. S5** Association constants of the **HG-M** (M= Hg<sup>2+</sup>, Ag<sup>+</sup> and Cu<sup>2+</sup>) treated by I<sup>-</sup>, I<sub>3</sub><sup>-</sup>, and HSO<sub>4</sub><sup>-</sup>, calculation formula and related data.

| Cation                                             | A(Slope) | B(Intercept) | R <sup>2</sup> | δ     | S                    | LOD                   |
|----------------------------------------------------|----------|--------------|----------------|-------|----------------------|-----------------------|
| HG-Hg <sup>2+</sup> -I <sup>-</sup>                | 11.65    | 53.36        | 0.995          | 3.683 | 1.16×10 <sup>7</sup> | 9.48×10 <sup>-7</sup> |
| HG-Ag <sup>+</sup> -I <sup>-</sup>                 | 25.12    | 20.60        | 0.990          | 3.683 | 2.51×10 <sup>7</sup> | 4.40×10 <sup>-7</sup> |
| HG-Cu <sup>2+</sup> -HSO <sub>4</sub> <sup>-</sup> | 15.33    | 16.51        | 0.999          | 3.683 | 1.53×10 <sup>7</sup> | 7.21×10 <sup>-7</sup> |

*Liner Equation*  $y = A.x + B$

Calculation formula  $\delta = \frac{\sqrt{\sum(F - F_c)^2}}{\sqrt{(N - 1)}}$       N=20      K=3      S=A×10<sup>6</sup>

**LOD=K×δ/S**

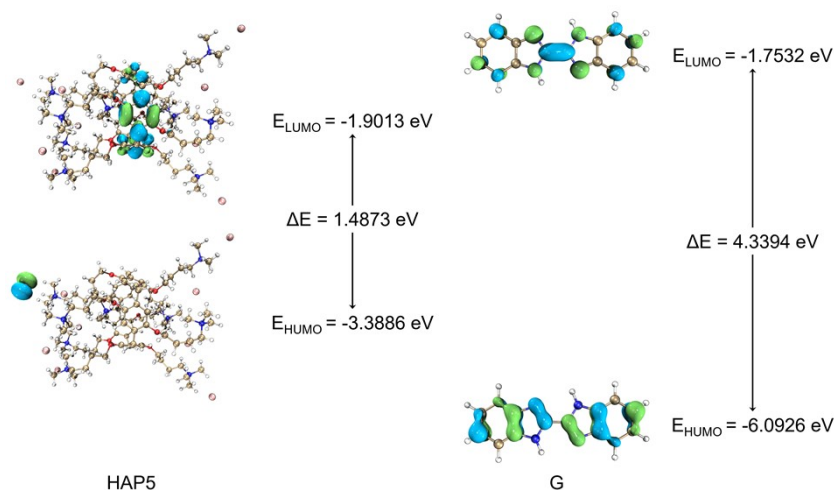

**Fig. S18** Frontier molecular orbital amplitude plots and electronic properties of **HAP5** and **G**.

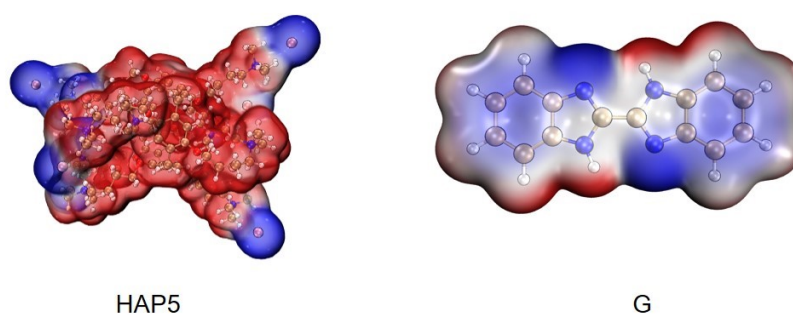

**Fig. S19** The electrostatic potential surface of **HAP5** and **G**.

**Tab. S6** Comparative result of I<sup>-</sup> chemosensors

| Entry | Compounds of probe | LOD for I <sup>-</sup> | solvent                          | Ref.      |
|-------|--------------------|------------------------|----------------------------------|-----------|
| 1     | HG-Ag <sup>+</sup> | 4.40×10 <sup>-7</sup>  | DMSO/H <sub>2</sub> O (v/v, 1/1) | This work |

|   |      |                       |                                 |    |
|---|------|-----------------------|---------------------------------|----|
| 2 | 2    | $4.74 \times 10^{-6}$ | THF/H <sub>2</sub> O (v/v, 9/1) | 51 |
| 3 | 1-Ag | $5.31 \times 10^{-6}$ | H <sub>2</sub> O                | 49 |
| 4 | 2    | $5.20 \times 10^{-4}$ | THF/H <sub>2</sub> O (v/v, 2/1) | 52 |

Tab. S7 Comparative result of HSO<sub>4</sub><sup>-</sup>chemosensors

| Entry | Compounds of probe  | LOD for I <sup>-</sup> | solvent                          | Ref.      |
|-------|---------------------|------------------------|----------------------------------|-----------|
| 1     | HG-Cu <sup>2+</sup> | $7.21 \times 10^{-7}$  | DMSO/H <sub>2</sub> O (v/v, 1/1) | This work |
| 2     | 1                   | $7.79 \times 10^{-7}$  | DMSO/H <sub>2</sub> O (v/v, 1/1) | 50        |
| 3     | 1                   | $3.72 \times 10^{-6}$  | MeOH                             | 53        |
| 4     | T-Zn <sup>2+</sup>  | $3.84 \times 10^{-6}$  | CH <sub>3</sub> CN               | 48        |

#### Notes and references

1. Q. Lin, Y.-Q. Fan, P.-P. Mao, L. Liu, J. Liu, Y.-M. Zhang, H. Yao and T.-B. Wei, *Chemistry – A European Journal*, 2018, **24**, 777-783.
2. Q. Lin, L. Liu, F. Zheng, P.-P. Mao, J. Liu, Y.-M. Zhang, H. Yao and T.-B. Wei, *RSC Advances*, 2017, **7**, 34411-34414.
3. T. Wei, J. Liu, H. Yao, Q. Lin, Y. Xie, B. Shi, P. Zhang, X. You and Y. Zhang, *Chinese Journal of Chemistry*, 2013, **31**, 515-519.
